# Supplementary material for: Cleavage of cyclopropyl ketones mediated by alkylmercury(ii) hydridesA preliminary account of part of this work was presented at the 12th National Symposium of Organic Chemistry (XII SINAQO), Córdoba, Argentina, November 1999. Abstract published in Molecules (online computer file), 2000, 5, 447.Electronic supplementary information (ESI) available: UHF/6-31G**-calculated structures, spin-density surfaces, cartesian coordinates, total atomic spin densities and Fermi-contact data for simplified models of radicals 18, 19 and 20. See http://www.rsc.org/suppdata/p1/b1/b107258g/
Source: Royal Society of Chemistry journal article supplement (doi:10.1039/b107258g), 2001-12-18
Supplement: b107258g.pdf [file b107258g.pdf]

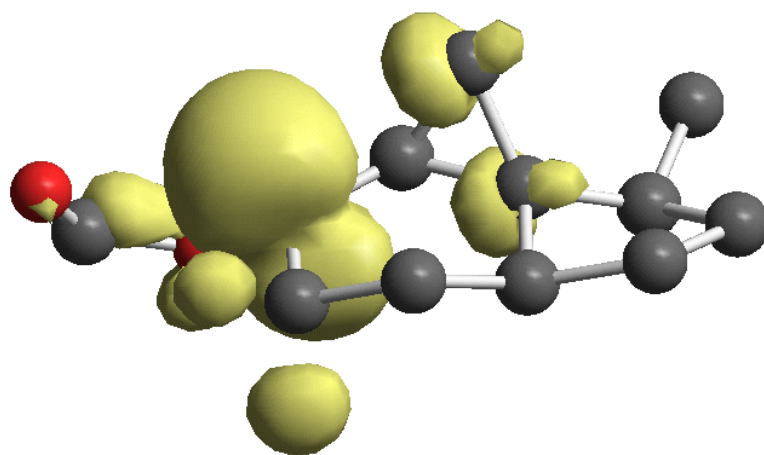

**a**

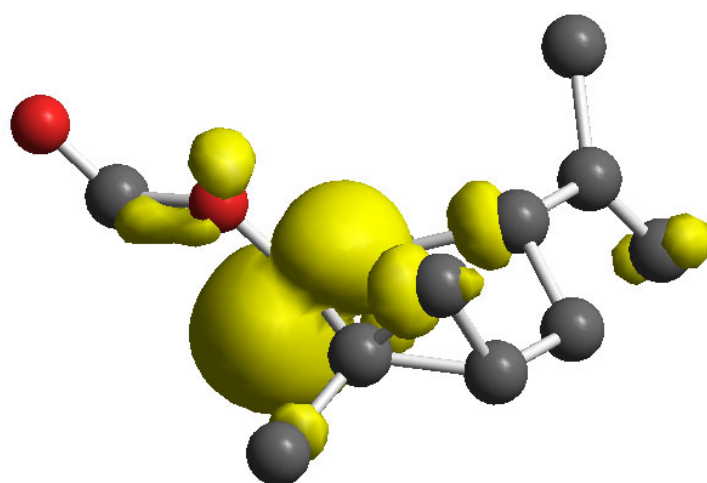

**b**

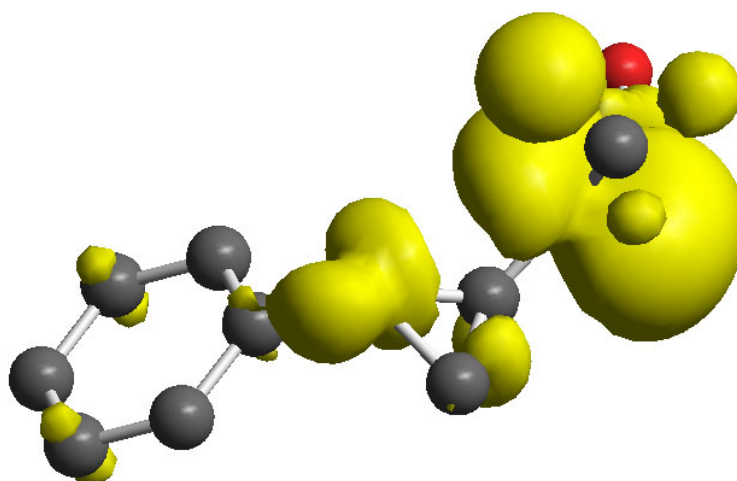

**c**

**Figure 2.** 3D structures and spin density surfaces from UHF/6-31G\*\* calculations (Gaussian 98; Chem3D Ultra 5.0, Cambridge Soft) for minimum energy conformations of simplified models of intermediate radicals a) **18**, b) **19** and c) **20** (most stable conformer presenting delocalization of spin density on the phenyl ring is shown). Surfaces drawn at 0.002 a.u. for **a**, 0.004 a.u. for **b** and 0.001 a.u. for **c**. See Figure 1 for structures.

**Cartesian coordinates, total atomic spin densities and Fermi contact data for UHF/6-31G\*\* optimized structure of simplified model of radical 18 (Figure 1a).**

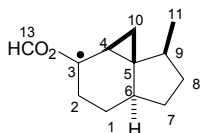

| Center Number | Atomic Number | Coordinates (Angstroms) |           |           |
|---------------|---------------|-------------------------|-----------|-----------|
|               |               | X                       | Y         | Z         |
| 1             | 6             | 0.177852                | 1.992241  | 0.218384  |
| 2             | 6             | 1.484077                | 1.347936  | -0.274597 |
| 3             | 6             | 1.533112                | -0.138180 | -0.027760 |
| 4             | 6             | 0.309512                | -0.960636 | 0.163271  |
| 5             | 6             | -1.013110               | -0.262235 | 0.067770  |
| 6             | 6             | -1.014676               | 1.208958  | -0.313991 |
| 7             | 6             | -2.434137               | 1.637905  | 0.070858  |
| 8             | 6             | -3.302152               | 0.382112  | -0.218449 |
| 9             | 6             | -2.317933               | -0.782870 | -0.526908 |
| 10            | 6             | -0.516021               | -0.703487 | 1.406824  |
| 11            | 6             | -2.817385               | -2.146564 | -0.063298 |
| 12            | 8             | 2.537061                | -0.830389 | -0.710304 |
| 13            | 6             | 3.797222                | -0.695401 | -0.332088 |
| 14            | 8             | 4.198524                | -0.023292 | 0.553145  |
| 15            | 1             | 0.139473                | 3.020423  | -0.129689 |
| 16            | 1             | 0.159696                | 2.036184  | 1.303331  |
| 17            | 1             | 2.344304                | 1.821998  | 0.185061  |
| 18            | 1             | 1.572671                | 1.512841  | -1.350107 |
| 19            | 1             | 0.402184                | -1.981940 | -0.163642 |
| 20            | 1             | -0.948193               | 1.235921  | -1.403637 |
| 21            | 1             | -2.768600               | 2.512181  | -0.478261 |
| 22            | 1             | -2.472003               | 1.887895  | 1.127536  |
| 23            | 1             | -3.982372               | 0.543438  | -1.048482 |
| 24            | 1             | -3.914580               | 0.136434  | 0.643668  |
| 25            | 1             | -2.174891               | -0.832457 | -1.605305 |
| 26            | 1             | -0.981562               | -1.559461 | 1.860968  |
| 27            | 1             | -0.149106               | 0.016589  | 2.115875  |
| 28            | 1             | -2.089570               | -2.929055 | -0.259654 |
| 29            | 1             | -3.042899               | -2.151978 | 0.998282  |
| 30            | 1             | -3.728683               | -2.411041 | -0.591619 |
| 31            | 1             | 4.431281                | -1.307213 | -0.967155 |

E(UHF) = -614.010280662 A.U.; Convrg = 0.4784D-08; -V/T = 2.0010

Annihilation of the first spin contaminant:

S\*\*2 before annihilation 0.7641, after 0.7502

| Atom number | Atom type | Total atomic spin densities | Isotropic Fermi Contact Couplings (au) |
|-------------|-----------|-----------------------------|----------------------------------------|
| 1           | C         | 0.008809                    | 0.00314                                |
| 2           | C         | -0.139086                   | -0.03466                               |
| <b>3</b>    | <b>C</b>  | <b>1.125912</b>             | <b>0.30555</b>                         |
| 4           | C         | -0.191192                   | -0.05826                               |
| 5           | C         | 0.064190                    | 0.03075                                |
| 6           | C         | -0.007840                   | -0.00394                               |
| 7           | C         | 0.000956                    | 0.00150                                |
| 8           | C         | 0.003308                    | 0.00282                                |
| 9           | C         | -0.000756                   | 0.00371                                |
| 10          | C         | 0.071602                    | 0.04135                                |
| 11          | C         | -0.000053                   | 0.00000                                |
| 12          | O         | -0.033353                   | 0.00045                                |
| 13          | C         | 0.015984                    | 0.02222                                |
| 14          | O         | 0.002792                    | -0.00069                               |

**Bold type** indicates predominantly localized radical center; *italic type* indicates cyclopropane carbons.

**Cartesian coordinates, total atomic spin densities and Fermi contact data for UHF/6-31G\*\* optimized structure of simplified model of radical 19 (Figure 1b).**

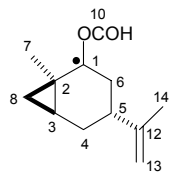

| Center Number | Atomic Number | Coordinates (Angstroms) |           |           |
|---------------|---------------|-------------------------|-----------|-----------|
|               |               | X                       | Y         | Z         |
| 1             | 6             | -1.011649               | 0.091546  | -0.341653 |
| 2             | 6             | -1.225767               | -1.346461 | -0.025969 |
| 3             | 6             | 0.015223                | -2.171080 | 0.176208  |
| 4             | 6             | 1.396914                | -1.573542 | -0.034916 |
| 5             | 6             | 1.454324                | -0.060834 | 0.208685  |
| 6             | 6             | 0.362627                | 0.627190  | -0.644133 |
| 7             | 6             | -2.449766               | -1.969096 | -0.673194 |
| 8             | 6             | -0.835551               | -1.814983 | 1.355120  |
| 9             | 8             | -1.889090               | 0.937312  | 0.328943  |
| 10            | 6             | -2.457783               | 1.932766  | -0.342060 |
| 11            | 8             | -3.155919               | 2.730551  | 0.171146  |
| 12            | 6             | 2.815974                | 0.575142  | -0.036581 |
| 13            | 6             | 3.714324                | 0.099756  | -0.881841 |
| 14            | 6             | 3.085792                | 1.828186  | 0.763000  |
| 15            | 1             | -0.058078               | -3.195686 | -0.151473 |
| 16            | 1             | 1.692763                | -1.783287 | -1.058983 |
| 17            | 1             | 2.114243                | -2.075540 | 0.608140  |
| 18            | 1             | 1.214378                | 0.122597  | 1.253591  |
| 19            | 1             | 0.598447                | 0.451572  | -1.692117 |
| 20            | 1             | 0.373886                | 1.700254  | -0.490640 |
| 21            | 1             | -2.547783               | -3.012230 | -0.391379 |
| 22            | 1             | -2.388082               | -1.919280 | -1.756763 |
| 23            | 1             | -3.352826               | -1.454305 | -0.359764 |
| 24            | 1             | -1.436736               | -2.590650 | 1.797116  |
| 25            | 1             | -0.481424               | -1.087262 | 2.062758  |
| 26            | 1             | -2.223505               | 1.932334  | -1.405977 |
| 27            | 1             | 4.655038                | 0.601013  | -1.030120 |
| 28            | 1             | 3.561828                | -0.795918 | -1.454789 |
| 29            | 1             | 4.032834                | 2.277578  | 0.490342  |
| 30            | 1             | 2.306586                | 2.571510  | 0.616711  |
| 31            | 1             | 3.110540                | 1.602849  | 1.826636  |

E(UHF) = -613.985774973 A.U.; Convg = 0.6790D-08; -V/T = 2.0010

Annihilation of the first spin contaminant:

S\*\*2 before annihilation 0.7642, after 0.7502

| Atom number | Atom type | Total atomic spin densities | Isotropic Fermi Contact Couplings (au) |
|-------------|-----------|-----------------------------|----------------------------------------|
| 1           | C         | <b>1.141111</b>             | <b>0.29342</b>                         |
| 2           | C         | <i>-0.152068</i>            | <i>-0.04844</i>                        |
| 3           | C         | <i>0.000342</i>             | <i>-0.00054</i>                        |
| 4           | C         | <i>-0.005634</i>            | <i>-0.00184</i>                        |
| 5           | C         | <i>0.059509</i>             | <i>0.04201</i>                         |
| 6           | C         | <i>-0.151740</i>            | <i>-0.03986</i>                        |
| 7           | C         | <i>0.024839</i>             | <i>0.02662</i>                         |
| 8           | C         | <i>0.067033</i>             | <i>0.03356</i>                         |
| 9           | O         | <i>-0.020617</i>            | <i>0.00680</i>                         |
| 10          | C         | <i>0.001496</i>             | <i>0.03415</i>                         |
| 11          | O         | <i>0.004681</i>             | <i>-0.00100</i>                        |
| 12          | C         | <i>-0.062123</i>            | <i>-0.00959</i>                        |
| 13          | C         | <i>0.067741</i>             | <i>0.01122</i>                         |
| 14          | C         | <i>0.007523</i>             | <i>0.00242</i>                         |

**Bold type** indicates predominantly localized radical center; *italic type* indicates cyclopropane carbons.

**Cartesian coordinates, total atomic spin densities and Fermi contact data for UHF/6-31G\*\* optimized structure of simplified model of radical 20 (Figure 1c).**

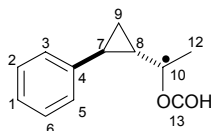

| Center Number | Atomic Number | Coordinates (Angstroms) |           |           |
|---------------|---------------|-------------------------|-----------|-----------|
|               |               | X                       | Y         | Z         |
| 1             | 6             | 3.949415                | 1.112875  | -0.038088 |
| 2             | 6             | 2.767767                | 1.737565  | -0.406240 |
| 3             | 6             | 1.591310                | 1.012238  | -0.477791 |
| 4             | 6             | 1.576128                | -0.347441 | -0.182645 |
| 5             | 6             | 2.765674                | -0.964306 | 0.182188  |
| 6             | 6             | 3.945429                | -0.239767 | 0.255370  |
| 7             | 6             | 0.300176                | -1.128825 | -0.299799 |
| 8             | 6             | -0.892869               | -0.787374 | 0.569901  |
| 9             | 6             | -0.153614               | -2.077033 | 0.762615  |
| 10            | 6             | -2.266542               | -0.708257 | 0.016955  |
| 11            | 8             | -2.638748               | 0.579668  | -0.367848 |
| 12            | 6             | -2.880779               | -1.750534 | -0.861952 |
| 13            | 6             | -3.111136               | 1.411185  | 0.554362  |
| 14            | 8             | -3.400851               | 2.527685  | 0.317354  |
| 15            | 1             | 4.863779                | 1.676615  | 0.020264  |
| 16            | 1             | 2.762042                | 2.788738  | -0.634917 |
| 17            | 1             | 0.675444                | 1.501823  | -0.761610 |
| 18            | 1             | 2.770775                | -2.016220 | 0.408766  |
| 19            | 1             | 4.858179                | -0.732330 | 0.541490  |
| 20            | 1             | 0.055939                | -1.423555 | -1.308097 |
| 21            | 1             | -0.689636               | -0.034403 | 1.314450  |
| 22            | 1             | 0.440579                | -2.164106 | 1.654911  |
| 23            | 1             | -0.617981               | -2.996604 | 0.454505  |
| 24            | 1             | -3.946112               | -1.572195 | -0.952288 |
| 25            | 1             | -2.459753               | -1.722756 | -1.866277 |
| 26            | 1             | -2.732175               | -2.743194 | -0.456445 |
| 27            | 1             | -3.210042               | 0.957413  | 1.539956  |

E(UHF) = -611.670892867 A.U.; Convg = 0.7060D-08; -V/T = 2.0011

Annihilation of the first spin contaminant:

S\*\*2 before annihilation 0.7635, after 0.7501

| Atom number | Atom type | Total atomic spin densities | Isotropic Fermi Contact Couplings (au) |
|-------------|-----------|-----------------------------|----------------------------------------|
| 1           | C         | -0.014231                   | -0.00248                               |
| 2           | C         | 0.014989                    | 0.00241                                |
| 3           | C         | -0.013227                   | -0.00138                               |
| 4           | C         | 0.007563                    | 0.00160                                |
| 5           | C         | -0.011904                   | 0.00089                                |
| 6           | C         | 0.015379                    | 0.00315                                |
| 7           | C         | <i>0.114792</i>             | <i>0.05182</i>                         |
| 8           | C         | <i>-0.170427</i>            | <i>-0.04080</i>                        |
| 9           | C         | <i>0.005298</i>             | <i>0.00201</i>                         |
| <b>10</b>   | <b>C</b>  | <b>1.108286</b>             | <b>0.30397</b>                         |
| 11          | O         | -0.021426                   | 0.00382                                |
| 12          | C         | -0.139533                   | -0.03992                               |
| 13          | C         | 0.007475                    | 0.03752                                |
| 14          | O         | -0.003068                   | -0.00320                               |

**Bold type** indicates predominantly localized radical center; *italic type* indicates cyclopropane carbons.
